# Supplementary material for: Family history and obesity in youth, their effect on acylcarnitine/aminoacids metabolomics and non-alcoholic fatty liver disease (NAFLD). Structural equation modeling approach
Source: PubMed Central journal article supplement (PMC5821462; doi:10.1371/journal.pone.0193138), 2018-02-21
Supplement: pone.0193138.s001.pdf [file pone.0193138.s001.pdf]

**S1 Table. SEM Model 1 estimates.**

| Factors/variables |               | $\beta$ | $\beta$ std | S.E   | p-value |
|-------------------|---------------|---------|-------------|-------|---------|
| Obesity           | AA1           | 0.705   | 0.369       | 0.181 | <0.001  |
|                   | AA2           | 0.337   | 0.436       | 0.087 | <0.001  |
|                   | Abd_circunf   | 0.886   | 0.804       | 0.109 | <0.001  |
|                   | AC2           | 0.031   | 0.021       | 0.14  | 0.823   |
|                   | AC3           | 0.284   | 0.251       | 0.091 | 0.002   |
|                   | BMI           | 1.265   | 0.936       | 0.142 | <0.001  |
|                   | FAT           | 1       | 0.654       |       |         |
|                   | INFL          | -1.661  | -0.351      | 1.576 | 0.292   |
|                   | PCR           | 3.268   | 0.819       | 0.848 | <0.001  |
| AA1               | AC1           | -0.065  | -0.134      | 0.091 | 0.474   |
|                   | AC2           | 0.518   | 0.653       | 0.135 | <0.001  |
|                   | AC3           | 0.179   | 0.301       | 0.046 | <0.001  |
|                   | ARG           | 1       | 0.843       |       |         |
|                   | GLY           | 0.312   | 0.54        | 0.046 | <0.001  |
|                   | INFL          | -1.655  | -0.669      | 0.686 | 0.016   |
|                   | LEU           | 0.798   | 0.976       | 0.048 | <0.001  |
|                   | Matsuda Index | 0.14    | 0.082       | 0.344 | 0.684   |
|                   | PHE           | 0.794   | 0.902       | 0.055 | <0.001  |
|                   | VAL           | 0.58    | 0.883       | 0.053 | <0.001  |
| AA2               | AC1           | 0.779   | 0.649       | 0.275 | 0.005   |
|                   | AC2           | -0.839  | -0.428      | 0.309 | 0.007   |
|                   | AC4           | 0.512   | 0.278       | 0.18  | 0.004   |
|                   | ALA           | 1.242   | 0.819       | 0.183 | <0.001  |
|                   | CIT           | 1       | 0.558       |       |         |
|                   | INFL          | 2.982   | 0.488       | 1.917 | 0.12    |
|                   | Matsuda Index | -1.719  | -0.407      | 0.992 | 0.083   |
|                   | MET           | 0.816   | 0.526       | 0.16  | <0.001  |
|                   | ORN           | 1.969   | 0.794       | 0.294 | <0.001  |
|                   | PRO           | 1.434   | 0.643       | 0.244 | <0.001  |
|                   | TYR           | 1.54    | 0.885       | 0.218 | <0.001  |
| AC1               | C2            | 2.471   | 0.81        | 0.364 | <0.001  |

|             |               |        |        |        |        |
|-------------|---------------|--------|--------|--------|--------|
|             | C3            | 2.324  | 0.982  | 0.345  | <0.001 |
|             | C4            | 1      | 0.543  |        |        |
|             | Fatty Liver   | -0.027 | -0.058 | 0.042  | 0.514  |
|             | INFL          | 1.174  | 0.23   | 0.655  | 0.073  |
|             | Matsuda Index | 0.31   | 0.088  | 0.428  | 0.469  |
| AC2         | C10           | 1.264  | 0.832  | 0.138  | <0.001 |
|             | C10:1         | 0.605  | 0.71   | 0.075  | <0.001 |
|             | C10:2         | 0.317  | 0.306  | 0.092  | <0.001 |
|             | C12           | 0.908  | 0.854  | 0.097  | <0.001 |
|             | C12:1         | 0.671  | 0.815  | 0.075  | <0.001 |
|             | C14           | 0.694  | 0.53   | 0.117  | <0.001 |
|             | C14:1         | 0.857  | 0.864  | 0.091  | <0.001 |
|             | C14:2         | 1      | 0.695  |        |        |
|             | C5            | 0.593  | 0.48   | 0.108  | <0.001 |
|             | C6            | 0.557  | 0.455  | 0.109  | <0.001 |
|             | C8            | 1.075  | 0.684  | 0.141  | <0.001 |
|             | Fatty Liver   | -0.442 | -1.522 | 0.201  | 0.028  |
|             | Matsuda Index | 1.559  | 0.723  | 4.696  | 0.74   |
| AC3         | C0            | 0.707  | 0.594  | 0.102  | <0.001 |
|             | C16           | 1      | 0.753  |        |        |
|             | C16:1         | 1.016  | 0.248  | 0.359  | 0.005  |
|             | C18:1         | 1.267  | 0.848  | 0.127  | <0.001 |
|             | C18:2         | 1.16   | 0.656  | 0.154  | <0.001 |
|             | Fatty Liver   | 1.351  | 3.484  | 0.553  | 0.015  |
|             | INFL          | 1.993  | 0.478  | 1.422  | 0.161  |
|             | Matsuda I     | -4.987 | -1.731 | 14.397 | 0.729  |
| AC4         | Fatty Liver   | -0.747 | -2.416 | 0.325  | 0.021  |
|             | C18           | 1      | 0.705  |        |        |
|             | C18:1OH       | 3.704  | 0.287  | 1.263  | 0.003  |
|             | INFL          | -1.51  | -0.454 | 1.154  | 0.191  |
|             | Matsuda Index | 3.187  | 1.387  | 8.052  | 0.692  |
| Fatty Liver | ALT           | 2.81   | 0.48   | 0.637  | <0.001 |
|             | AST           | 1      | 0.289  |        |        |
|             | INFL          | 0.976  | 0.091  | 3.685  | 0.791  |

|      |               |       |        |       |       |
|------|---------------|-------|--------|-------|-------|
|      | Matsuda Index | 0.491 | 0.066  | 10.24 | 0.962 |
|      | NAFLD         | 9.946 | 0.838  | 3.272 | 0.002 |
|      | PCR           | -1.73 | -0.191 | 1.939 | 0.372 |
| INFL | TNFa          | 1     | 0.822  |       |       |
|      | IL-6          | 0.477 | 0.396  | 0.257 | 0.064 |
