# Supplementary material for: Family history and obesity in youth, their effect on acylcarnitine/aminoacids metabolomics and non-alcoholic fatty liver disease (NAFLD). Structural equation modeling approach
Source: PubMed Central journal article supplement (PMC5821462; doi:10.1371/journal.pone.0193138), 2018-02-21
Supplement: pone.0193138.s002.pdf [file pone.0193138.s002.pdf]

**S2 Table. SEM Model 2 estimates**

| Factors/variables |               | $\beta$ | $\beta$ std | S.E   | p-value |
|-------------------|---------------|---------|-------------|-------|---------|
| Family History    | AC1           | -0.021  | -0.05       | 0.053 | 0.698   |
|                   | AA1           | -0.084  | -0.104      | 0.094 | 0.369   |
|                   | AA2           | 0.001   | 0.004       | 0.038 | 0.973   |
|                   | AC2           | 0.028   | 0.042       | 0.09  | 0.753   |
|                   | AC3           | 0.077   | 0.15        | 0.074 | 0.3     |
|                   | AC4           | 0.106   | 0.182       | 0.09  | 0.238   |
|                   | DadFHOB       | 0.949   | 0.453       | 0.345 | 0.006   |
|                   | IndFHOB       | 1.282   | 0.476       | 0.458 | 0.005   |
|                   | MomFHOB       | 1       | 0.429       |       |         |
|                   | OB            | 0.14    | 0.324       | 0.063 | 0.027   |
| AA1               | INFL          | -0.705  | -0.3        | 0.368 | 0.055   |
|                   | ARG           | 1       | 0.833       |       |         |
|                   | GLY           | 0.313   | 0.528       | 0.047 | <0.001  |
|                   | LEU           | 0.801   | 0.976       | 0.05  | <0.001  |
|                   | PHE           | 0.796   | 0.897       | 0.058 | <0.001  |
|                   | VAL           | 0.582   | 0.878       | 0.055 | <0.001  |
| AA2               | ALA           | 1.241   | 0.807       | 0.191 | <0.001  |
|                   | CIT           | 1       | 0.543       |       |         |
|                   | Fatty Liver   | 0.323   | 0.208       | 0.281 | 0.25    |
|                   | Matsuda Index | -1.61   | -0.367      | 0.529 | 0.002   |
|                   | MET           | 0.828   | 0.519       | 0.168 | <0.001  |
|                   | OB            | 0.36    | 0.273       | 0.222 | 0.104   |
|                   | ORN           | 1.973   | 0.784       | 0.308 | <0.001  |
|                   | PRO           | 1.446   | 0.634       | 0.255 | <0.001  |
|                   | TYR           | 1.553   | 0.883       | 0.229 | <0.001  |
| AC1               | AA2           | 0.372   | 0.475       | 0.093 | <0.001  |
|                   | AA1           | 0.692   | 0.355       | 0.178 | <0.001  |
|                   | C2            | 2.432   | 0.82        | 0.35  | <0.001  |
|                   | C3            | 2.233   | 0.967       | 0.324 | <0.001  |
|                   | C4            | 1       | 0.556       |       |         |
|                   | INFL          | 1.49    | 0.326       | 0.6   | 0.013   |
|                   | Matsuda Index | 0.362   | 0.105       | 0.312 | 0.247   |
| AC2               | AA2           | -0.096  | -0.197      | 0.084 | 0.252   |

|         |               |        |        |       |        |
|---------|---------------|--------|--------|-------|--------|
|         | AA1           | -0.088 | -0.072 | 0.195 | 0.654  |
|         | C10           | 1.26   | 0.834  | 0.136 | <0.001 |
|         | C10:1         | 0.603  | 0.711  | 0.074 | <0.001 |
|         | C10:2         | 0.318  | 0.31   | 0.091 | <0.001 |
|         | C12           | 0.902  | 0.853  | 0.095 | <0.001 |
|         | C12:1         | 0.668  | 0.815  | 0.074 | <0.001 |
|         | C14           | 0.692  | 0.532  | 0.116 | <0.001 |
|         | C14:1         | 0.854  | 0.865  | 0.09  | <0.001 |
|         | C14:2         | 1      | 0.699  |       |        |
|         | C5            | 0.584  | 0.478  | 0.106 | <0.001 |
|         | C6            | 0.557  | 0.459  | 0.108 | <0.001 |
|         | C8            | 1.076  | 0.689  | 0.139 | <0.001 |
|         | Fatty Liver   | -0.696 | -0.921 | 0.441 | 0.114  |
|         | INFL          | -0.194 | -0.068 | 0.471 | 0.68   |
|         | OB            | -0.492 | -0.767 | 0.36  | 0.171  |
| AC3     | AA2           | 0.47   | 0.732  | 0.351 | 0.18   |
|         | AA1           | 1.192  | 0.748  | 0.767 | 0.121  |
|         | C0            | 0.694  | 0.594  | 0.1   | <0.001 |
|         | C16           | 1      | 0.766  |       |        |
|         | C16:1         | 1.048  | 0.261  | 0.35  | 0.003  |
|         | C18:1         | 1.28   | 0.869  | 0.124 | <0.001 |
|         | C18:2         | 1.156  | 0.665  | 0.149 | <0.001 |
|         | Fatty Liver   | 3.506  | 3.524  | 1.395 | 0.012  |
|         | OB            | 2.903  | 3.436  | 1.2   | 0.016  |
| AC4     | AA2           | -0.137 | -0.244 | 0.265 | 0.606  |
|         | AA1           | -0.373 | -0.268 | 0.583 | 0.523  |
|         | C18           | 1      | 0.654  |       |        |
|         | C18:1OH       | 3.779  | 0.273  | 1.308 | 0.004  |
|         | Fatty Liver   | -2.523 | -2.91  | 1.033 | 0.015  |
|         | Matsuda Index | 0.428  | 0.175  | 0.231 | 0.064  |
|         | OB            | -2.142 | -2.91  | 0.91  | 0.019  |
| Obesity | INFL          | 5.245  | 1.184  | 2.842 | 0.065  |
|         | Abd_circunf   | 0.905  | 0.811  | 0.114 | <0.001 |
|         | BMI           | 1.26   | 0.922  | 0.146 | <0.001 |
|         | FAT           | 1      | 0.644  |       |        |

|             |               |        |        |       |        |
|-------------|---------------|--------|--------|-------|--------|
|             | PCR           | 3.669  | 0.907  | 1.262 | 0.004  |
| FATTY LIVER | INFL          | -4.918 | -1.307 | 2.53  | 0.052  |
|             | ALT           | 1      | 0.448  |       |        |
|             | AST           | 0.339  | 0.258  | 0.083 | <0.001 |
|             | Matsuda Index | -1.048 | -0.371 | 0.311 | <0.001 |
|             | NAFLD         | 3.405  | 0.752  | 0.673 | <0.001 |
|             | PCR           | -0.929 | -0.271 | 1.043 | 0.373  |
| INFL        | IL-6          | 0.581  | 0.442  | 0.219 | 0.008  |
|             | TNFa          | 1      | 0.749  |       |        |
