# Supplementary material for: Family history and obesity in youth, their effect on acylcarnitine/aminoacids metabolomics and non-alcoholic fatty liver disease (NAFLD). Structural equation modeling approach
Source: PubMed Central journal article supplement (PMC5821462; doi:10.1371/journal.pone.0193138), 2018-02-21
Supplement: pone.0193138.s003.pdf [file pone.0193138.s003.pdf]

**S3 Table. SEM Model 3 estimates.**

| Factors/variables |                     | $\beta$ | $\beta$ std | S.E   | p-value |
|-------------------|---------------------|---------|-------------|-------|---------|
| Family History    | Obesity             | 0.069   | 0.223       | 0.047 | 0.138   |
|                   | DadFHOH             | 0.808   | 0.548       | 0.455 | 0.076   |
|                   | IndFHOH             | 1       | 0.527       |       |         |
|                   | MomFHOH             | 0.451   | 0.274       | 0.254 | 0.076   |
| AA1               | AC1                 | -0.065  | -0.134      | 0.091 | 0.476   |
|                   | AC2                 | 0.517   | 0.651       | 0.135 | <0.001  |
|                   | AC3                 | 0.179   | 0.302       | 0.046 | <0.001  |
|                   | ARG                 | 1       | 0.843       |       |         |
|                   | GLY                 | 0.312   | 0.54        | 0.046 | <0.001  |
|                   | INFL                | -1.654  | -0.667      | 0.686 | 0.016   |
|                   | LEU                 | 0.798   | 0.976       | 0.048 | <0.001  |
|                   | Matsuda Index Index | 0.14    | 0.082       | 0.344 | 0.684   |
|                   | PHE                 | 0.794   | 0.902       | 0.055 | <0.001  |
|                   | VAL                 | 0.58    | 0.883       | 0.053 | <0.001  |
| AA2               | AC1                 | 0.778   | 0.649       | 0.275 | 0.005   |
|                   | AC2                 | -0.836  | -0.427      | 0.309 | 0.007   |
|                   | AC4                 | 0.512   | 0.278       | 0.18  | 0.004   |
|                   | ALA                 | 1.242   | 0.819       | 0.183 | <0.001  |
|                   | CIT                 | 1       | 0.558       |       |         |
|                   | INFL                | 2.973   | 0.485       | 1.916 | 0.121   |
|                   | Matsuda Index Index | -1.719  | -0.407      | 0.992 | 0.083   |
|                   | MET                 | 0.816   | 0.526       | 0.16  | <0.001  |
|                   | ORN                 | 1.969   | 0.794       | 0.294 | <0.001  |
|                   | PRO                 | 1.434   | 0.643       | 0.244 | <0.001  |
|                   | TYR                 | 1.54    | 0.885       | 0.218 | <0.001  |
| AC1               | C2                  | 2.471   | 0.81        | 0.364 | <0.001  |
|                   | C3                  | 2.323   | 0.982       | 0.344 | <0.001  |
|                   | C4                  | 1       | 0.543       |       |         |

|         |                     |        |        |        |        |
|---------|---------------------|--------|--------|--------|--------|
|         | Fatty Liver         | -0.027 | -0.056 | 0.042  | 0.528  |
|         | INFL                | 1.168  | 0.229  | 0.654  | 0.074  |
|         | Matsuda Index Index | 0.3    | 0.085  | 0.401  | 0.454  |
| AC2     | C10                 | 1.264  | 0.832  | 0.138  | <0.001 |
|         | C10:1               | 0.605  | 0.71   | 0.075  | <0.001 |
|         | C10:2               | 0.317  | 0.306  | 0.092  | <0.001 |
|         | C12                 | 0.908  | 0.854  | 0.097  | <0.001 |
|         | C12:1               | 0.671  | 0.815  | 0.075  | <0.001 |
|         | C14                 | 0.694  | 0.53   | 0.117  | <0.001 |
|         | C14:1               | 0.857  | 0.864  | 0.091  | <0.001 |
|         | C14:2               | 1      | 0.695  |        |        |
|         | C5                  | 0.593  | 0.48   | 0.108  | <0.001 |
|         | C6                  | 0.557  | 0.455  | 0.109  | <0.001 |
|         | C8                  | 1.075  | 0.684  | 0.141  | <0.001 |
|         | Fatty Liver         | -0.437 | -1.506 | 0.199  | 0.028  |
|         | Matsuda Index Index | 1.432  | 0.664  | 4.097  | 0.727  |
| AC3     | Fatty Liver         | 1.339  | 3.451  | 0.548  | 0.015  |
|         | INFL                | 1.997  | 0.478  | 1.428  | 0.162  |
|         | C16                 | 1      | 0.753  |        |        |
|         | C18:1               | 1.267  | 0.848  | 0.127  | <0.001 |
|         | C18:2               | 1.16   | 0.656  | 0.154  | <0.001 |
|         | C16:1               | 1.016  | 0.248  | 0.359  | 0.005  |
|         | Matsuda Index       | -4.605 | -1.599 | 12.573 | 0.714  |
|         | C0                  | 0.707  | 0.594  | 0.102  | <0.001 |
| AC4     | Fatty Liver         | -0.74  | -2.394 | 0.321  | 0.021  |
|         | C18                 | 1      | 0.706  |        |        |
|         | C18:1OH             | 3.704  | 0.287  | 1.262  | 0.003  |
|         | INFL                | -1.522 | -0.457 | 1.157  | 0.188  |
|         | Matsuda Index       | 2.975  | 1.296  | 7.035  | 0.672  |
| Obesity | AA1                 | 0.7    | 0.368  | 0.181  | <0.001 |
|         | AA2                 | 0.336  | 0.435  | 0.087  | <0.001 |

|                |               |        |        |       |        |
|----------------|---------------|--------|--------|-------|--------|
|                | Abd_circunf   | 0.885  | 0.805  | 0.109 | <0.001 |
|                | AC2           | 0.033  | 0.022  | 0.14  | 0.812  |
|                | AC3           | 0.286  | 0.252  | 0.09  | 0.002  |
|                | BMI           | 1.261  | 0.935  | 0.141 | <0.001 |
|                | FAT           | 1      | 0.656  |       |        |
|                | INFL          | -1.554 | -0.329 | 1.542 | 0.314  |
|                | PCR           | 3.237  | 0.813  | 0.829 | <0.001 |
| FATTY<br>LIVER | ALT           | 2.81   | 0.48   | 0.637 | <0.001 |
|                | AST           | 1      | 0.289  |       |        |
|                | INFL          | 0.76   | 0.071  | 3.612 | 0.833  |
|                | Matsuda Index | 0.244  | 0.033  | 8.987 | 0.978  |
|                | NAFLD         | 9.947  | 0.839  | 3.276 | 0.002  |
|                | PCR           | -1.661 | -0.183 | 1.893 | 0.38   |
| INFL           | IL-6          | 1      | 0.824  |       |        |
|                | TNFa          | 0.475  | 0.395  | 0.258 | 0.065  |
